# Supplementary material for: A study of microbially fabricated bio-conjugated quantum dots for pico-molar sensing of H2O2 and glucose
Source: Royal Society of Chemistry journal article supplement (doi:10.1039/d0bm01206h), 2020-10-21
Supplement: d0bm01206h1.pdf [file d0bm01206h1.pdf]

# Supporting Information

## **A Study of microbially fabricated bio-conjugated quantum dots for pico-molar sensing of H<sub>2</sub>O<sub>2</sub> and glucose**

*Reddhy Mahle<sup>1†</sup>, Debabrata Mandal<sup>4†</sup>, Partha Kumbhakar<sup>2</sup>, Amreesh Chandra<sup>3</sup>,*

*Chandra Sekhar Tiwary<sup>2,\*</sup>, Rintu Banerjee<sup>1,\*</sup>*

<sup>1</sup> Agricultural and Food Engineering Department, Indian Institute of Technology Kharagpur

<sup>2</sup> Department of Metallurgical and Materials Engineering, Indian Institute of Technology  
Kharagpur

<sup>3</sup> Department of Physics, Indian Institute of Technology Kharagpur, West Bengal, India-721302

<sup>4</sup> School of Nanoscience and technology, Indian Institute of Technology Kharagpur, West  
Bengal, India-721302

† Equal contribution

## CONTENT

- (I) Growth media preparation and culture condition for *Pseudomonas aeruginosa* with the growth curve
- (II) Molybdenum threshold shown by *P.aeruginosa* cells
- (III) Mass balance for Mo removal by *P. aeruginosa*
- (IV) Quantum yield calculation for MoS<sub>2</sub> QDs
- (V) UV-Vis spectra of H<sub>2</sub>O<sub>2</sub> overlapped with PL emission spectra of MoS<sub>2</sub> QDs and UV-Vis spectra of H<sub>2</sub>O<sub>2</sub> in the MoS<sub>2</sub> QDs suspension at different concentration x= 10 nM, y= 20nM, z= 50 nM
- (VI) UV-Vis spectra of glucose overlapped with PL emission spectra of MoS<sub>2</sub> QDs and UV-Vis spectra of glucose in the MoS<sub>2</sub> QDs suspension at different concentration x= 10 nM, y= 20nM, z= 50 nM
- (VII) Sensing performance of MoS<sub>2</sub> QDs
- (VIII) Glucose and H<sub>2</sub>O<sub>2</sub> analysis in the presence of Phosphate buffer solution
- (IX) LOD comparison among materials for H<sub>2</sub>O<sub>2</sub> and glucose detection
- (X) FRET efficiency comparison for glucose and H<sub>2</sub>O<sub>2</sub>
- (XI) MoS<sub>2</sub> QDs selectivity and the effect of pH on detection
- (XII) MoS<sub>2</sub> QDs' Quantum Yield comparison and QDs stability

### **(I) Growth media preparation and culture condition for *Pseudomonas aeruginosa***

The biological preparation of 2D MoS<sub>2</sub> QDs was carried out using molybdate reducing bacteria i.e. *Pseudomonas aeruginosa*, obtained from Microbial Biotechnology and Downstream Processing Laboratory, Indian Institute of Technology, Kharagpur, India. The anaerobic microbial cultivation was carried out at 37 °C in modified P2 medium containing 0.25g/L yeast extract and 0.4 M glucose. Sodium β glycerophosphate (1g/L) was used as a phosphorus source while Magnesium Sulphate heptahydrate (2.5g/L) and 0.01 g/L each of sodium chloride, ferrous sulphate heptahydrate and manganese sulphate monohydrate were used as a salt mixture in the media. The pH of the culture during experimental conditions i.e. 8-9 was maintained using Sodium bicarbonate (2.5 g/L). Cysteine hydrochloride monohydrate (0.2% (w/v)) was included in the media components to act as a reducing agent and the sulphur source. Sodium Molybdate dihydrate pure was obtained from Sigma-Aldrich. Molybdenum standard for Atomic Absorption Spectroscopy (AAS) was purchased from Agilent technologies.

The bacterial growth curve was plotted with absorbance at 660 nm versus time post-inoculation of *P.aeruginosa* in the growth media. Lag phase refers to the no increment in the absorbance that is directly proportional to cell growth, log phase represents the exponential growth of the cells while the stationary phase is defined as the saturated growth of the microorganism.

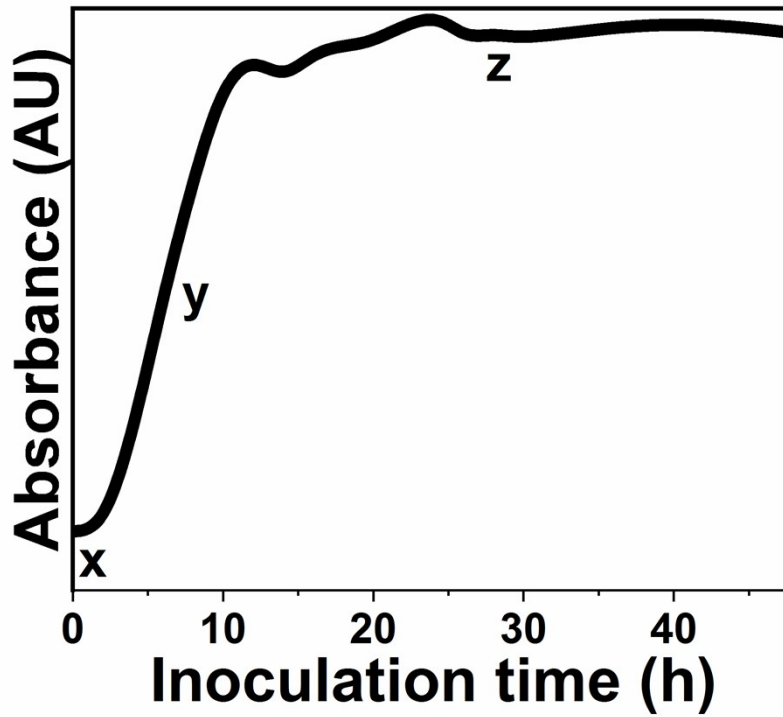

**Figure S1.** Growth curve obtained for *P. aeruginosa* where x= lag, y= log and z= stationary phase of growth

(II)

**Table S1.** Molybdenum threshold shown by *P.aeruginosa* cells

| [Mo] concentration<br>(mM) | Lag hours<br>(h) | Colony Formation |
|----------------------------|------------------|------------------|
| 0.5                        | 2                | Yes              |
| 1                          | 2                | Yes              |
| 2                          | 2                | Yes              |
| 4                          | 4                | Yes              |
| 6                          | 8                | Yes              |
| 8                          | NA               | No               |
| 10                         | NA               | No               |

(III)

**Table S2.** Mass balance for Mo removal by *P. aeruginosa*

| Cysteine concentration (%) |                    | Initial concentration (mM) | Final concentration (mM) | Percentage removal |
|----------------------------|--------------------|----------------------------|--------------------------|--------------------|
| 0.2                        | Inoculated media   | 1                          | 0.16                     | 84%                |
|                            | Uninoculated media | 1                          | 0.97                     | 3%                 |

**(IV)**

Quantum yield (Q) of the MoS<sub>2</sub> quantum dot, in water solution, was measured using the following relation.

$$Q = Q_{std} \times \frac{M_x}{M_{std}} \times \frac{\eta_x^2}{\eta_{std}^2} \quad (1)$$

Where  $M_x$  and  $\eta_x$  is the slope of the linear plot and refractive index of the solvent for MoS<sub>2</sub> quantum dot, respectively.  $Q_{std}$ ,  $M_{std}$  and  $\eta_{std}$  denote the quantum yield, slope and refractive index of the standard sample (Methylene blue with quantum yield 0.52), respectively.

Calculation of Quantum yield:

| <b>Sample</b>       | <b>Slope</b> | <b>Refractive Index</b> | <b>Quantum yield</b> |
|---------------------|--------------|-------------------------|----------------------|
| Methylene Blue      | 0.71         | 1.33                    | 0.52                 |
| MoS <sub>2</sub> QD | 0.63         | 1.33                    | 0.46                 |

(V)

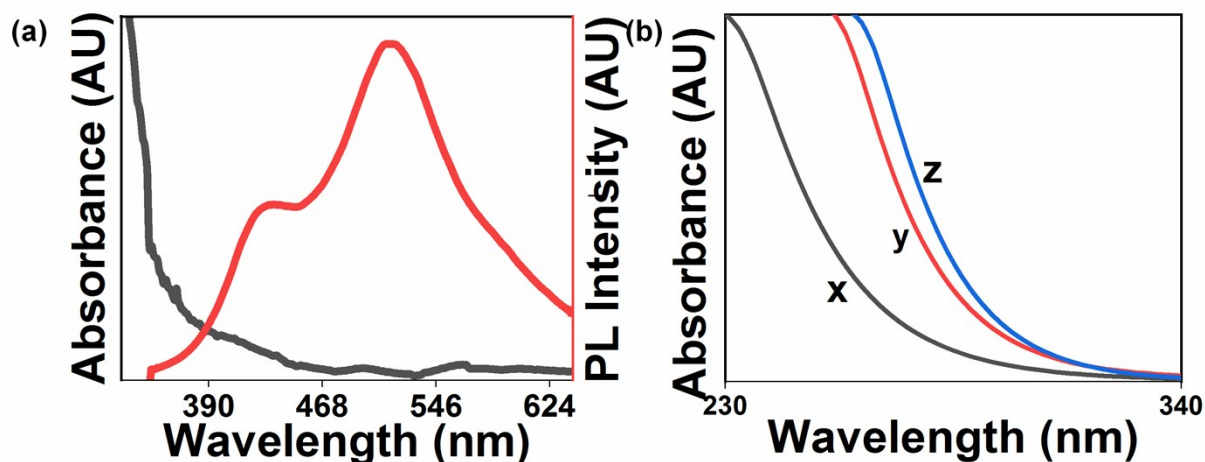

**Figure S2.** (a) UV-Vis spectra of H<sub>2</sub>O<sub>2</sub> overlapped with PL emission spectra of MoS<sub>2</sub> QDs, (b) UV-Vis spectra of H<sub>2</sub>O<sub>2</sub> in the MoS<sub>2</sub> QDs suspension at different concentration x= 10 nM, y= 20nM, z= 50 nM.

The overlap integral ( $J(\lambda)$ ) characterizing the overlap between the emission spectrum of the MoS<sub>2</sub> QDs and the absorption spectrum of the H<sub>2</sub>O<sub>2</sub> and glucose, and it can be calculated according to the following equation:

$$J = \frac{\int_0^{\infty} f_D(\lambda)\varepsilon(\lambda)\lambda^4 d\lambda}{\int_0^{\infty} f_D(\lambda)d\lambda}$$

Where,  $f_D$  is the unnormalized emission spectrum of the donor.  $\varepsilon$  is the molar absorption coefficient of the acceptor.  $\lambda$  is the emission wavelength. The large spectral overlap in between donor (MoS<sub>2</sub> QDs) and acceptor (H<sub>2</sub>O<sub>2</sub>, glucose) confirms the possibility of excited energy transfer. We have also calculated the overlap integral values for H<sub>2</sub>O<sub>2</sub> is  $2.40 \times 10^9 \text{ M}^{-1}\text{cm}^{-1}\text{nm}^4$



(VI)

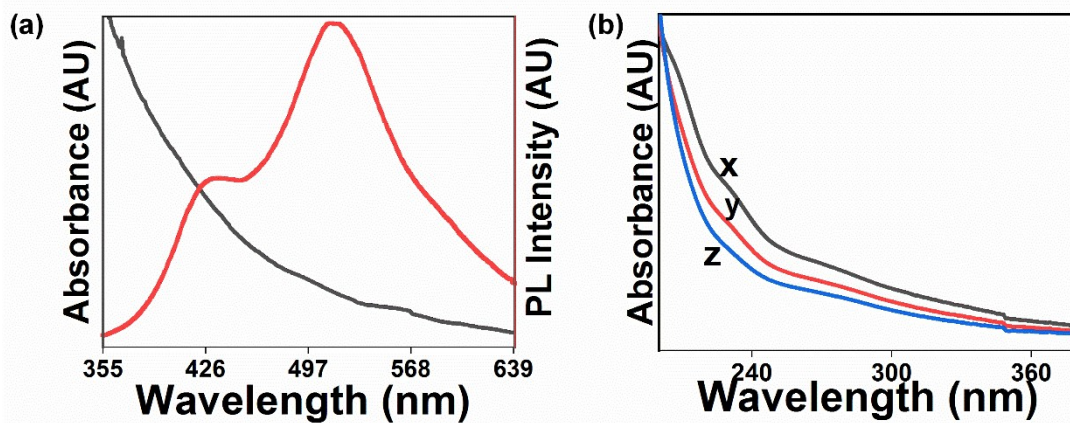

**Figure S3.** (a) UV-Vis spectra of glucose overlapped with PL emission spectra of MoS<sub>2</sub> QDs, (b) UV-Vis spectra of glucose in the MoS<sub>2</sub> QDs suspension at different concentration x= 10 nM, y= 20nM, z= 50 nM.

The oxidation of glucose produced D-gluconic acid and H<sub>2</sub>O<sub>2</sub>, where GO<sub>x</sub> acts as an oxidant in aqueous solution. The oxidation reaction was:<sup>4</sup>

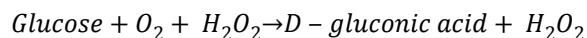

The formation rate of H<sub>2</sub>O<sub>2</sub> was directly proportional to the concentration of glucose added in the MoS<sub>2</sub> QDs solution. We observed that the PL intensity of MoS<sub>2</sub> QDs decreases with increasing glucose concentration. In Figure S3 (a), it was shown that the PL emission spectra of the MoS<sub>2</sub> QDs and the UV-Vis absorption spectra of glucose around were overlapped each other. This is the evidence for FRET phenomenon. PL intensity of MoS<sub>2</sub> QDs was found to be gradually decreasing with the increment of glucose molecules, because of MoS<sub>2</sub> QDs donates the energy, which was accepted by glucose molecules.

We have also calculated the overlap integral values for glucose is  $4.11 \times 10^9 \text{ M}^{-1} \text{ cm}^{-1} \text{ nm}^4$ .

(VII)

**Table S3** Sensing performance of MoS<sub>2</sub> QDs

| <b>Detection</b>                  | <b>Overlap integral<br/>(<math>\text{M}^{-1} \text{ cm}^{-1} \text{ nm}^4</math>)</b> | <b>Limit of<br/>detection<br/>(<math>\mu\text{M}</math>)</b> | <b><math>K_{sv}</math> (<math>\text{nM}^{-1}</math>)</b> | <b><math>R^2</math></b> | <b>Linear range<br/>(<math>\text{nM}</math>)</b> |
|-----------------------------------|---------------------------------------------------------------------------------------|--------------------------------------------------------------|----------------------------------------------------------|-------------------------|--------------------------------------------------|
| <b>Glucose</b>                    | <b><math>4.11 \times 10^9</math></b>                                                  | <b>2</b>                                                     | <b>0.02352</b>                                           | <b>0.99849</b>          | <b>0-30</b>                                      |
|                                   |                                                                                       | <b>68</b>                                                    | <b>0.00710</b>                                           | <b>0.94582</b>          | <b>30-50</b>                                     |
| <b>H<sub>2</sub>O<sub>2</sub></b> | <b><math>2.40 \times 10^9</math></b>                                                  | <b>43</b>                                                    | <b>0.02167</b>                                           | <b>0.97192</b>          | <b>0-30</b>                                      |
|                                   |                                                                                       | <b>87</b>                                                    | <b>0.69971</b>                                           | <b>0.95706</b>          | <b>30-50</b>                                     |

(VIII)

**Table S4 Glucose and H<sub>2</sub>O<sub>2</sub> analysis in the presence of Phosphate buffer solution**

| <b>Sample</b>                     | <b>Added (nM)</b> | <b>Found(nM)</b> | <b>Recovery (%)</b> | <b>RSD (%)<br/>(n=5)</b> |
|-----------------------------------|-------------------|------------------|---------------------|--------------------------|
| <b>Glucose</b>                    | 10                | 9.89             | 98.9                | -                        |
|                                   | 20                | 19.85            | 99.25               | 1.01                     |
|                                   | 30                | 29.8             | 99.33               | 2.00                     |
| <b>H<sub>2</sub>O<sub>2</sub></b> | 10                | 9.45             | 94.5                | 1.07                     |
|                                   | 20                | 19.89            | 99.45               | 2.35                     |
|                                   | 30                | 29.85            | 99.50               | 1.27                     |

(IX)

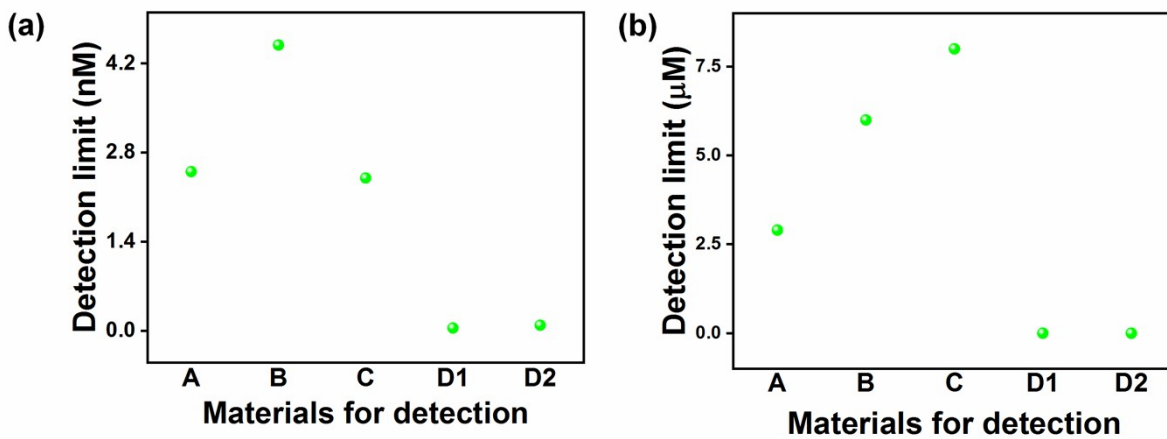

**Figure S4** (a) H<sub>2</sub>O<sub>2</sub> detection limit shown by materials: A= MoS<sub>2</sub>, B= CdTe, C= WS<sub>2</sub>, D1= MoS<sub>2</sub> QDs for H<sub>2</sub>O<sub>2</sub> (0-30nM), and D2= MoS<sub>2</sub> QDs for H<sub>2</sub>O<sub>2</sub> (30-50nM) (b) Glucose detection limit for materials: A= ZnO, B= Carbon QDs, C= B-doped Carbon QDs, D1 = MoS<sub>2</sub> QDs for glucose (0-30nM), and D2= MoS<sub>2</sub> QDs for glucose (30-50nM)

(X)

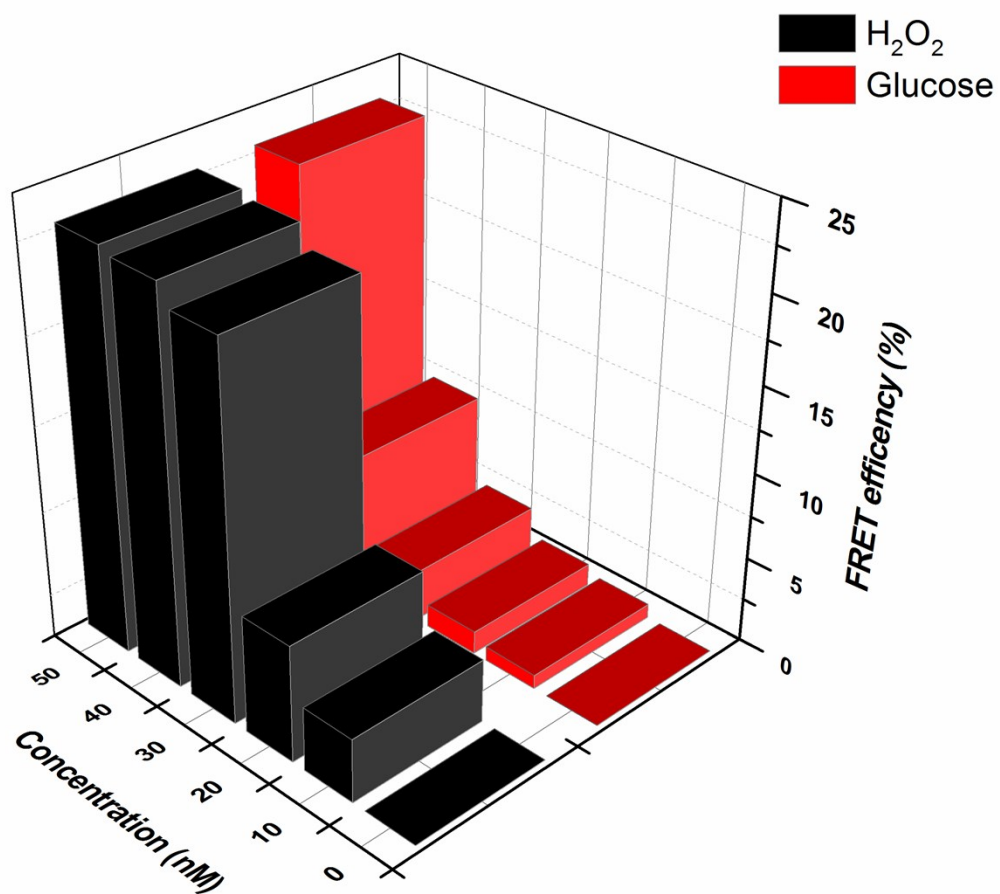

**Figure S5.** FRET efficiency comparison for glucose and H<sub>2</sub>O<sub>2</sub>

(XI)

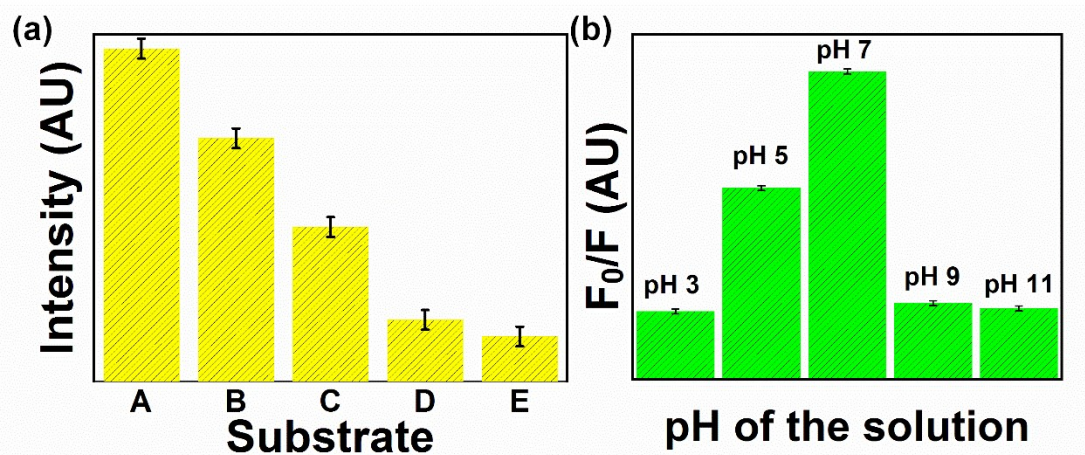

**Figure S6.** (a) Selectivity of the biologically produced MoS<sub>2</sub> QDs towards substrates: A- H<sub>2</sub>O<sub>2</sub>; B-Glucose; C- Sucrose; D-Galactose and E-Lactose, (b) MoS<sub>2</sub> QDs in the different pH parameter.

(XII)

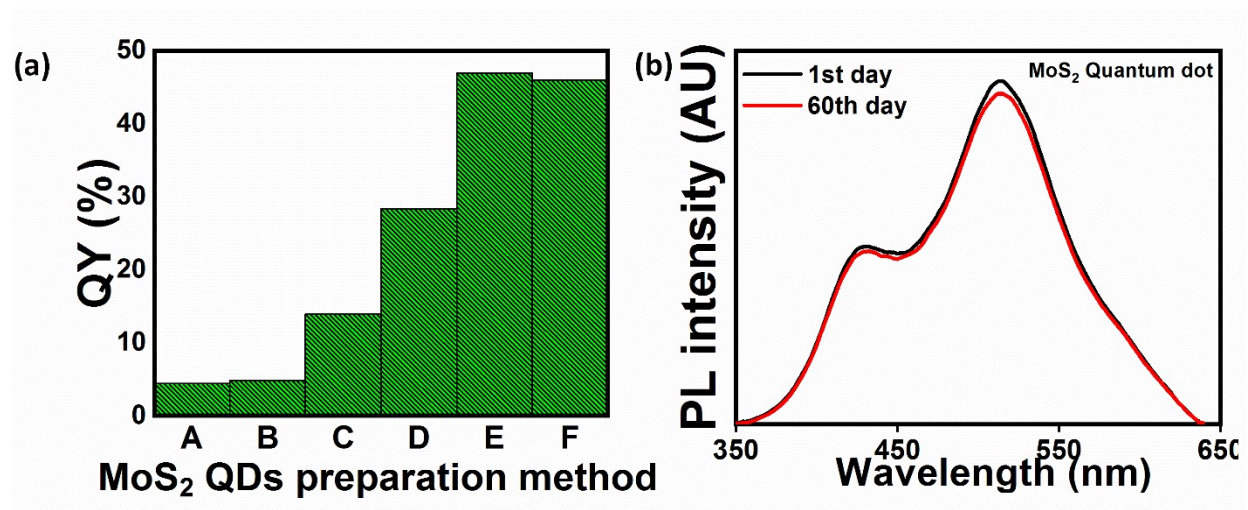

**Figure S7.** (a) Comparative bar chart demonstrating the QY (%) for different MoS<sub>2</sub> QDs preparation methods i.e. A –colloidal synthesis; B – Ultrasonic exfoliation; C –Electrochemical method; D – Ultrasonication experiment; E – Hydrothermal method and F: present method (*P.aeruginosa* mediated) and (b) QY stability shown over a period of two months.

From Figure S7 (b), it is clear that for 60 days there is no significant change in the PL intensity. It is indicated that as-prepared MoS<sub>2</sub> QDs are highly stable for a long time.
